# Supplementary material for: Enhanced efficacy of direct immunochemotherapy for hepatic cancer with image-guided intratumoral radiofrequency hyperthermia
Source: PubMed Central journal article supplement — J Immunother Cancer. 2022 Nov 30;10(11):e005619. doi: 10.1136/jitc-2022-005619 (PMC9717415; doi:10.1136/jitc-2022-005619), 2022-11-30
Supplement: jitc-2022-005619supp001.pdf [file jitc-2022-005619supp001.pdf]

**Supplemental Table S1. Sequences of the primers for qPCR analysis.**

| Gene          | Primers | Sequence (5'-3')          |
|---------------|---------|---------------------------|
| GAPDH         | Forward | CCTCGTCCCGTAGACAAAATG     |
|               | Reverse | TGAGGTCAATGAAGGGGTCGT     |
| IL-2          | Forward | TCACCCTTGCTAATCACTCCTC    |
|               | Reverse | TCCTGTAATTCTCCATCCTGCT    |
| IL-4          | Forward | GATAAGCTGCACCATGAATGAGT   |
|               | Reverse | CCATTTGCATGATGCTCTTTAGG   |
| IL-18         | Forward | AGACCTGGAATCAGACAACCTTTGG |
|               | Reverse | GGGTCACAGCCAGTCCTCTT      |
| IFN- $\gamma$ | Forward | CTCAAGTGGCATAGATGTGGAAG   |
|               | Reverse | TGACCTCAAACCTGGCAATACTC   |
| TNF- $\alpha$ | Forward | CCCTCACACTCACAAACCACC     |
|               | Reverse | CTTTGAGATCCATGCCGTTG      |
| IL-10         | Forward | AATAAGCTCCAAGACCAAGGTGT   |
|               | Reverse | CATCATGTATGCTTCTATGCAGTTG |

**Supplemental Table S2. Statistical comparison of cytotoxic effects among eight treatment groups of in-vitro experiments.**

| Cytotoxic effects          | Control   | RFH        | L-315      | RFH+L-315    | DOX        | RFH+DOX      | L-315+DOX    | RFH+L-315+DOX |
|----------------------------|-----------|------------|------------|--------------|------------|--------------|--------------|---------------|
| Necrotic / Apoptotic cells | 5.5%±1.4% | 6.9%±1.2%  | 51.8%±2.7% | 70.7%±2.3% # | 49.6%±2.3% | 71.4%±2.4% & | 81.0%±2.2% † | 95.5%±1.6% *  |
| Cell viability             | 100%±0.0% | 96.2%±3.3% | 50.2%±4.8% | 32.4%±2.6% # | 50.1%±2.2% | 33.8%±4.2% & | 19.1%±2.7% † | 10.3%±2.1% *  |
| Relative BS                | 100%±0.0% | 96.5%±1.9% | 49.6%±2.6% | 22.9%±1.7% # | 50.0%±2.2% | 27.9%±1.9% & | 11.1%±1.5% † | 5.1%±0.6% *   |

BS: bioluminescence signal

\*:  $p < 0.001$  (The triple treatment group of RFH + LTX-315 + liposomal doxorubicin versus other seven treatment groups)

#:  $p < 0.001$  (The group of RFH+LTX-315 versus LTX-315 alone)

&:  $p < 0.001$  (The group of RFH+DOX versus DOX alone)

†:  $p < 0.001$  (The group of L-315+DOX versus L-315 alone or DOX alone)

**Supplemental Table S3. Statistical comparison of imaging findings among eight groups of in-vivo experiments.**

| Imaging findings               | Control      | RFH          | L-315        | RFH+L-315    | DOX          | RFH+DOX      | L-315+DOX    | RFH+L-315+DOX |
|--------------------------------|--------------|--------------|--------------|--------------|--------------|--------------|--------------|---------------|
| Baseline TV (mm <sup>3</sup> ) | 133.45±26.61 | 132.31±34.29 | 129.79±23.56 | 125.69±15.55 | 129.00±26.91 | 127.17±20.15 | 124.03±23.91 | 127.43±35.48  |
| Relative PS                    | 3.29±0.28    | 3.28±0.24    | 0.63±0.02    | 0.44±0.03 #  | 0.80±0.02    | 0.56±0.02 &  | 0.26±0.04 †  | 0.06±0.03 *   |
| Relative TV                    | 3.26±0.19    | 3.25±0.23    | 0.72±0.02    | 0.44±0.02 #  | 0.80±0.03    | 0.54±0.02 &  | 0.25±0.03 †  | 0.04 ± 0.02 * |

TV: tumor volume; PS: photon signals.

\*:  $p < 0.001$  (The triple treatment group of RFH + LTX-315 + liposomal doxorubicin versus other seven treatment groups)

#:  $p < 0.001$  (The group of RFH+LTX-315 versus LTX-315 alone)

&:  $p < 0.001$  (The group of RFH+DOX versus DOX alone)

†:  $p < 0.001$  (The group of L-315+DOX versus L-315 alone or DOX alone)

**Supplemental Table S4. Statistical comparison of pathology confirmation among eight treatment groups of in-vivo experiments.**

| Pathology confirmation                        | Control    | RFH        | L-315      | RFH+L-315    | DOX        | RFH+DOX      | L-315+DOX               | RFH+L-315+DOX |
|-----------------------------------------------|------------|------------|------------|--------------|------------|--------------|-------------------------|---------------|
| Relative TW                                   | 23.55±4.06 | 22.93±3.88 | 12.05±1.12 | 7.17±0.40 #  | 12.90±0.88 | 7.87±0.45 &  | 4.49±0.53 <sup>†</sup>  | 1.00±0.00 *   |
| Apoptotic cells<br>(×10 <sup>6</sup> IOD)     | 0.94±0.17  | 0.97±0.09  | 3.66±0.24  | 7.51±0.32 #  | 3.59±0.19  | 7.42±0.36 &  | 12.54±0.94 <sup>†</sup> | 27.29±1.25 *  |
| Proliferating cells<br>(×10 <sup>7</sup> IOD) | 2.78±0.19  | 2.71±0.15  | 1.86±0.09  | 1.25±0.07 #  | 1.91±0.12  | 1.25±0.05 &  | 0.93±0.04 <sup>†</sup>  | 0.67±0.08 *   |
| Tumor necrosis rate                           | 5.5%±1.4%  | 6.9%±1.2%  | 51.8%±2.7% | 70.7%±2.3% # | 49.6%±2.3% | 69.2%±2.1% & | 81.1%±2.2% <sup>†</sup> | 95.5%±1.6% *  |

TW: Tumor weights

\*:  $p < 0.001$  (The triple treatment group of RFH + LTX-315 + liposomal doxorubicin versus other seven treatment groups)

#:  $p < 0.001$  (The group of RFH+LTX-315 versus LTX-315 alone)

&:  $p < 0.001$  (The group of RFH+DOX versus DOX alone)

<sup>†</sup>:  $p < 0.001$  (The group of L-315+DOX versus L-315 alone or DOX alone)
